# Supplementary material for: Characterization of adipose tissue macrophages and adipose-derived stem cells in critical wounds
Source: PeerJ. 2017 Jan 4;5:e2824. doi: 10.7717/peerj.2824 (PMC5217526; doi:10.7717/peerj.2824)
Supplement: Data S1 [file peerj-05-2824-s005.xlsx]

## Sheet: Sheet1
qCD29		qCD34		qCD73		qCD90		qCD105		qCD80		qCD163		qiNOS		qIL-1b		qIL-1RA		qTGFb		fCD80/CD163
HAT	IAT	HAT	IAT	HAT	IAT	HAT	IAT	HAT	IAT	HAT	IAT	HAT	IAT	HAT	IAT	HAT	IAT	HAT	IAT	HAT	IAT	HAT	IAT
99.35	137.38	26.55	43.16	55.18	48.46	96.43	63.19	24.48	40.88	90.17	82.57	332.91	37.4	365.18	1216.05	96.92	38.42	48.96	35.9	19.5	9.5	2.03	4.43
29.85	4.17	14.38	6.48	29.75	50.45	50.59	161.63	2.44	28.13	38.5	510.28	24.29	3.66	1130.82	1580.88	343.57	32.2	153.91	38.77	8.99	7.51	0.34	5.9
35.8	34.62	72.83	13.38	45.68	41.09	153.41	38.84	85.49	3.4	147.02	56.45	11.68	26.92	54.75	335.47	248.49	509.13	65.6	93.49	19.41	11.86	0.37	2.44
222.15	23.66	105.82	13.97	218.04	62.18	50.53	32.96	68.72	6.77	196.87	119.33	38.82	45.28	144.88	2767.49	149.45	1659.57	5.22	169.16	69.34	7.99	2.07	0.29
127.36	30.83	94.45	49.72	62.63	107.66	101.76	115.17	163.92	31.52	250.79	326.32	235.99	30.21	17.54	401.5	153.17	971.21	57.59	205.14	121.49	10.63	0.28	0.44
88.7	60.91	140.27	0.27	97.78	82.38	117.35	139.07	79.1	21.63	31.29	361.7	43.93	2.08	30.77	43.75	4.12	2921	178.41	117.47	263.72	15.23	0.35	0.37
133.64	29.99	118.82	109.95	151.96	75.69	125.22	92.14	343.54	10.25	20.98	634.4	162.49	11.38	9.45	1817.44	25.82	98.95	18.33	123.44	81.75	11.41	2.33	1.3
143.46	198.59	53.72	21.74	170.16	60.22	73.51	146.82	55.92	78.97	68.7	164.27	211.63	65.97	83.58	1315.46	62.41	311.37	329.29	124.16	122.74	1.79	0.68	4.82
101.78	40.93	129.48	8.75	109.37	143.55	142.38	99.49	55.24	39.04	14.86	218.24	95.32	73.54	4.46	173.13	175.18	78.42	3.55	246.86	96.59	21.32	0.33	2.07
145.8	17.01	87.29	0.58	78.18	211.88	133.27	114.74	41.94	1.55	130.68	132.19	9.6	30.37	51.14	139.94	332.26	1395.54	3.33	235.6	95.98	8.48	0.8	6.01
121.78	14.24	108.45	55.57	35.98	61.72	86.37	44.84	84.28	18.85	21.61	582.97	74.04	1.22	7.33	69.98	7.08	1491.09	150.04	37.89	31.64	65.28	0.44	3.44
113.73	32.87	57.88	22.48	100.91	57.44	114.48	43.5	8.43	30.57	9.87	401.3	79	10.41	18.58	257.93	70.86	683.22	36.69	483.93	104.63	39.14	0.42	0.84
25.15	16.54	92.17	20.59	102.62	44.81	65.17	386.71	113.13	21.07	9.53	789.67	38.11	27.55	48.41	156.71	99.46	112.9	47.48	110.25	179.78	10.26	1.61	2.71
46.91	14.83	259.23	8.08	220.42	99.17	111.75	39.86	263.06	3.03	246.41	610.72	42.18	59.86	22.28	264.99	179.93	443.92	27.89	148.65	124.8	15.94	0.55	2.13
93.45	18.72	152.8	7.15	78.14	102.08	106.62	36.37	136.14	0.55	105.48	138.01	203.19	25.95	130.01	27.42	5.06	216.33	73.49	328.89	159.67	2.55	1.12	5.18
91.4	4.55	131.9	12.17	104.96	132.13	89.4	59.21	97.1	16.89	29.93	31.64	244.68	12.05	4.78	315.89	5.32	38.36	151.19	145.42	271.68	105.27	0.17	0.37
89.72	21.86	101.41	52.12	54.51	91.72	87.68	157.98	177.92	33.07	81.74	44.28	94.18	174.03	16.41	19.63	124.01	902.71	58.04	97.51	17.54	14.79	0.46	0.46
91.84	64.15	43.5	12.56	135.12	132.22	144.6	14.39	55.94	17.19	179.3	27.05	30.73	85.43	6.65	156.83	6.87	211.87	11.87	105.99	43.58	6.36	0.94	1.89
112.71	33.26	126.48	14.42	103.82	86.25	56.05	42.81	96.12	6.67	277.61	906.59	25.26	4.43	27.22	146.14	13.01	892.05	234.25	27.49	38.52	105.2	3.21	1.49
85.43	6.3	82.56	14.05	44.79	31.38	93.42	70.61	47.08	33.7	48.66	37.93	97.38	239.95	110.1	1003.25	1.92	1434.25	54.05	25.35	122.21	37.27	0.81	5.57
